# Supplementary material for: Comparative study on proton conductivity of a polypyridinyl multicarboxylate-based hydrogen-bonded organic framework and related chitosan composite membrane
Source: Royal Society of Chemistry journal article supplement (doi:10.1039/d2nj04779a), 2022-12-05
Supplement: d2nj04779a1.pdf [file d2nj04779a1.pdf]

## Supporting information

### **Comparative study on proton conductivity of a polypyridinyl multicarboxylate-based hydrogen-bonded organic framework and related chitosan composite membrane**

Lu-Lu Kang, Shuai-Wu Zuo, Bing-Xue Han and Gang Li\*

*<sup>a</sup>College of Chemistry and Green Catalysis Centre, Zhengzhou University, Zhengzhou 450001, Henan, P. R. China*

\*To whom correspondence should be addressed.

E-mail: gangli@zzu.edu.cn

**Table S1.** Crystallographic data and structure refinement information for HOF 1.

|                                                            | HOF 1                                                            |
|------------------------------------------------------------|------------------------------------------------------------------|
| Formula                                                    | C <sub>24</sub> H <sub>23</sub> N <sub>3</sub> O <sub>10</sub>   |
| $F_w$                                                      | 513.45                                                           |
| Crystal system                                             | monoclinic                                                       |
| Space group                                                | $P2_1/n$                                                         |
| $a$ (Å)                                                    | 7.9842(3)                                                        |
| $b$ (Å)                                                    | 18.7164(7)                                                       |
| $c$ (Å)                                                    | 15.8121(5)                                                       |
| $\alpha$ (deg)                                             | 90                                                               |
| $\beta$ (deg)                                              | 92.417(3)                                                        |
| $\gamma$ (deg)                                             | 90                                                               |
| $V$ (Å <sup>3</sup> )                                      | 2360.78(16)                                                      |
| $Z$                                                        | 4                                                                |
| $\rho_{\text{calc}}$ /cm <sup>3</sup>                      | 1.445                                                            |
| $F(000)$                                                   | 1072.0                                                           |
| $\mu$ (mm <sup>-1</sup> )                                  | 0.971                                                            |
| Theta range for data collection                            | 7.322 to 134.112                                                 |
| Index ranges                                               | $-7 \leq h \leq 9$ , $-22 \leq k \leq 14$ , $-14 \leq l \leq 18$ |
| Reflections                                                | 8515                                                             |
| Data/restraints/parameters                                 | 4219/2/346                                                       |
| Goodness-of-fit on $F^2$                                   | 1.029                                                            |
| Final $R$ indices [ $I > 2\sigma(I)$ ]                     | $R_1 = 0.0658$ , $wR_2 = 0.1769$                                 |
| Final $R$ indexes [all data]                               | $R_1 = 0.0899$ , $wR_2 = 0.2002$                                 |
| $Dr_{\text{min}}$ and $Dr_{\text{max}}$ /e Å <sup>-3</sup> | 0.36/-0.35                                                       |

**Table S2.** Selected bond distances (Å) and angles (deg) for **1**.

|            |          |             |          |
|------------|----------|-------------|----------|
| O(1)-C(1)  | 1.206(4) | C(6)-C(7)   | 1.394(4) |
| O(2)-C(1)  | 1.303(4) | C(7)-C(8)   | 1.387(4) |
| O(3)-C(2)  | 1.212(4) | C(8)-C(9)   | 1.397(4) |
| O(4)-C(2)  | 1.312(4) | C(9)-C(17)  | 1.503(4) |
| O(5)-C(3)  | 1.245(4) | C(10)-C(11) | 1.365(5) |
| O(6)-C(3)  | 1.244(4) | C(11)-C(12) | 1.380(5) |
| N(1)-C(10) | 1.338(4) | C(12)-C(13) | 1.378(5) |
| N(1)-C(14) | 1.344(4) | C(13)-C(14) | 1.375(4) |
| N(2)-C(15) | 1.342(4) | C(14)-C(15) | 1.484(4) |
| N(2)-C(19) | 1.334(4) | C(15)-C(16) | 1.385(4) |
| N(3)-C(20) | 1.361(4) | C(16)-C(17) | 1.387(4) |
| N(3)-C(24) | 1.369(4) | C(17)-C(18) | 1.384(4) |
| C(1)-C(4)  | 1.499(4) | C(18)-C(19) | 1.396(4) |
| C(2)-C(6)  | 1.496(4) | C(19)-C(20) | 1.492(4) |
| C(3)-C(8)  | 1.514(4) | C(20)-C(21) | 1.353(4) |
| C(4)-C(5)  | 1.392(4) | C(21)-C(22) | 1.356(5) |
| C(4)-C(9)  | 1.397(4) | C(22)-C(23) | 1.376(6) |
| C(5)-C(6)  | 1.381(4) | C(23)-C(24) | 1.366(6) |

**Table S3.** Selected bond distances (Å) and angles (deg) for HOF **1**

|                  |          |                   |          |
|------------------|----------|-------------------|----------|
| C(10)-N(1)-C(14) | 123.3(3) | N(1)-C(10)-C(11)  | 120.0(3) |
| C(19)-N(2)-C(15) | 117.6(2) | C(10)-C(11)-C(12) | 118.5(3) |
| C(20)-N(3)-C(24) | 118.7(3) | C(13)-C(12)-C(11) | 120.3(3) |
| O(1)-C(1)-O(2)   | 123.8(3) | C(14)-C(13)-C(12) | 119.8(3) |
| O(1)-C(1)-C(4)   | 123.3(3) | N(1)-C(14)-C(13)  | 118.1(3) |
| O(2)-C(1)-C(4)   | 112.9(2) | N(1)-C(14)-C(15)  | 117.3(3) |
| O(3)-C(2)-O(4)   | 123.8(3) | C(13)-C(14)-C(15) | 124.6(3) |
| O(3)-C(2)-C(6)   | 122.5(3) | N(2)-C(15)-C(14)  | 115.1(2) |
| O(4)-C(2)-C(6)   | 113.7(3) | N(2)-C(15)-C(16)  | 123.8(3) |

|                 |          |                   |          |
|-----------------|----------|-------------------|----------|
| O(5)-C(3)-C(8)  | 116.8(3) | C(16)-C(15)-C(14) | 121.2(3) |
| O(6)-C(3)-O(5)  | 125.5(3) | C(15) C(16) C(17) | 118.2(3) |
| O(6)-C(3)-C(8)  | 117.6(3) | C(16)-C(17)-C(9)  | 121.6(2) |
| C(5)-C(4)-C(1)  | 120.2(2) | C(18)-C(17)-C(9)  | 119.7(2) |
| C(5)-C(4)-C(9)  | 119.7(2) | C(18)-C(17)-C(16) | 118.7(3) |
| C(9)-C(4)-C(1)  | 120.0(2) | C(17)-C(18)-C(19) | 119.1(3) |
| C(6)-C(5)-C(4)  | 120.9(3) | N(2)-C(19)-C(18)  | 122.6(3) |
| C(5)-C(6)-C(2)  | 119.6(3) | N(2)-C(19)-C(20)  | 117.2(2) |
| C(5)-C(6)-C(7)  | 119.2(3) | C(18)-C(19)-C(20) | 120.2(2) |
| C(7)-C(6)-C(2)  | 121.1(3) | N(3)-C(20)-C(19)  | 119.1(3) |
| C(8)-C(7)-C(6)  | 120.6(3) | C(21)-C(20)-N(3)  | 122.2(3) |
| C(7)-C(8)-C(3)  | 119.4(2) | C(21)-C(20)-C(19) | 118.7(3) |
| C(7)-C(8)-C(9)  | 120.1(3) | C(20)-C(21)-C(22) | 118.1(3) |
| C(9)-C(8)-C(3)  | 120.2(2) | C(21)-C(22)-C(23) | 122.1(3) |
| C(4)-C(9)-C(17) | 120.8(2) | C(24)-C(23)-C(22) | 118.1(3) |
| C(8)-C(9)-C(4)  | 119.4(3) | C(23)-C(24)-N(3)  | 120.9(3) |
| C(8)-C(9)-C(17) | 119.8(2) |                   |          |

**Table S4.** Hydrogen bonding parameters of HOF 1.

| D-H...A              | d(D-H)  | d(H...A) | d(D...A) | ∠(DHA)  |
|----------------------|---------|----------|----------|---------|
| O(2)-H(2)...O(6) #1  | 0.82    | 1.76     | 2.576(3) | 175.6   |
| O(7)-H(7B)...O(4)    | 0.87    | 1.75     | 2.592(4) | 162.9   |
| O(8)-H(8A)...O(7)    | 0.85    | 2.31     | 2.860(6) | 122.7   |
| O(8)-H(8B)...O(6)#2  | 0.85    | 1.94     | 2.790(5) | 175.9   |
| O(9)-H(9B)... O(5)   | 0.91(2) | 2.11(18) | 2.849(5) | 138(23) |
| N(1)-H(1)...O(10)#3  | 0.86    | 1.94     | 2.718(4) | 150.2   |
| O(10)-H(10B)...O(14) | 0.85    | 2.06     | 2.837(4) | 152.6   |

**Table S5.** Proton Conductivities ( $\text{S}\cdot\text{cm}^{-1}$ ) of HOF **1** at Different RHs and Temperatures.

| temp ( $^{\circ}\text{C}$ ) | RH (%)                |                       |                       |                       |                       |
|-----------------------------|-----------------------|-----------------------|-----------------------|-----------------------|-----------------------|
|                             | 68                    | 75                    | 85                    | 93                    | 98                    |
| 30                          | -                     | -                     | -                     | $1.21 \times 10^{-6}$ | $3.54 \times 10^{-6}$ |
| 40                          | -                     | -                     | -                     | $1.6 \times 10^{-6}$  | $4.6 \times 10^{-6}$  |
| 50                          | $1.03 \times 10^{-7}$ | $1.56 \times 10^{-7}$ | $2.6 \times 10^{-7}$  | $3.18 \times 10^{-6}$ | $4.96 \times 10^{-6}$ |
| 60                          | $3.73 \times 10^{-7}$ | $6.66 \times 10^{-7}$ | $8.88 \times 10^{-7}$ | $6.4 \times 10^{-6}$  | $1.84 \times 10^{-5}$ |
| 70                          | $7.93 \times 10^{-7}$ | $1.56 \times 10^{-7}$ | $2.9 \times 10^{-6}$  | $3.8 \times 10^{-5}$  | $4.16 \times 10^{-5}$ |
| 80                          | $1.18 \times 10^{-6}$ | $3.23 \times 10^{-6}$ | $4.08 \times 10^{-6}$ | $5.53 \times 10^{-5}$ | $1.48 \times 10^{-4}$ |
| 90                          | $4.42 \times 10^{-6}$ | $8.7 \times 10^{-6}$  | $1.25 \times 10^{-5}$ | $7.44 \times 10^{-5}$ | $2.08 \times 10^{-4}$ |
| 100                         | $1.02 \times 10^{-5}$ | $1.82 \times 10^{-5}$ | $8.41 \times 10^{-5}$ | $1.93 \times 10^{-4}$ | $4.83 \times 10^{-4}$ |

s

**Table S6.** The proton conductivities ( $\text{S}\cdot\text{cm}^{-1}$ ) of CS/HOF-**x** at 98% RH.

| temp ( $^{\circ}\text{C}$ ) | Wet (%)               |                       |                       |                       |                       |
|-----------------------------|-----------------------|-----------------------|-----------------------|-----------------------|-----------------------|
|                             | Pure CS               | 2%                    | 4%                    | 6%                    | 8%                    |
| 30                          | $1.42 \times 10^{-3}$ | $3.61 \times 10^{-3}$ | $4.01 \times 10^{-3}$ | $2.05 \times 10^{-3}$ | $1.27 \times 10^{-3}$ |
| 40                          | $2.01 \times 10^{-3}$ | $4.13 \times 10^{-3}$ | $4.92 \times 10^{-3}$ | $2.15 \times 10^{-3}$ | $1.58 \times 10^{-3}$ |
| 50                          | $2.46 \times 10^{-3}$ | $4.89 \times 10^{-3}$ | $6.30 \times 10^{-3}$ | $4.22 \times 10^{-3}$ | $2.00 \times 10^{-3}$ |
| 60                          | $3.40 \times 10^{-3}$ | $5.73 \times 10^{-3}$ | $1.06 \times 10^{-2}$ | $4.80 \times 10^{-3}$ | $2.85 \times 10^{-3}$ |
| 70                          | $5.38 \times 10^{-3}$ | $1.08 \times 10^{-2}$ | $1.13 \times 10^{-2}$ | $5.26 \times 10^{-3}$ | $4.28 \times 10^{-3}$ |
| 80                          | $7.10 \times 10^{-3}$ | $1.23 \times 10^{-2}$ | $1.31 \times 10^{-2}$ | $1.14 \times 10^{-2}$ | $6.34 \times 10^{-3}$ |
| 90                          | $1.04 \times 10^{-2}$ | $1.34 \times 10^{-2}$ | $1.74 \times 10^{-2}$ | $1.53 \times 10^{-2}$ | $1.50 \times 10^{-2}$ |
| 100                         | $1.25 \times 10^{-2}$ | $1.64 \times 10^{-2}$ | $2.61 \times 10^{-2}$ | $2.10 \times 10^{-2}$ | $1.94 \times 10^{-2}$ |

**Table S7.** Comparison of the  $\sigma$  of HOF **1** with that of other HOFs.

| materials                | conductivity ( $\text{S}\cdot\text{cm}^{-1}$ ) | testing conditions |
|--------------------------|------------------------------------------------|--------------------|
| UPC-H3 [1]               | $9.0 \times 10^{-2}$                           | 80 °C and 99% RH   |
| HOF-GS-10 [2]            | $0.75 \times 10^{-2}$                          | 85 °C and 90% RH   |
| HOF-GS-11 [2]            | $1.80 \times 10^{-2}$                          | 30 °C and 95% RH   |
| CPOS-2 [3]               | $3.7 \times 10^{-3}$                           | 100 °C and 98% RH  |
| MHOF-1 [4]               | $0.75 \times 10^{-3}$                          | 80 °C and 98% RH   |
| MHOF-3 [4]               | $0.97 \times 10^{-3}$                          | 80 °C and 98% RH   |
| CPOS-1 [3]               | $6.0 \times 10^{-4}$                           | 30 °C and 98% RH   |
| HOF <b>1</b>             | $4.83 \times 10^{-4}$                          | 100 °C and 98% RH  |
| MA-B-BDC [5]             | $4.32 \times 10^{-4}$                          | 50 °C and 98% RH   |
| CPOS-3 [3]               | $3.7 \times 10^{-4}$                           | 30 °C and 98% RH   |
| MHOF-2 [4]               | $3.5 \times 10^{-4}$                           | 80 °C and 98% RH   |
| MA-TMA [5]               | $3.11 \times 10^{-4}$                          | 70 °C and 98% RH   |
| HOF-H <sub>3</sub> L [6] | $6.91 \times 10^{-5}$                          | 30 °C and 98% RH   |
| CPOS-4 [3]               | $5.6 \times 10^{-5}$                           | 30 °C and 98% RH   |
| HOF 6 [7]                | $3.40 \times 10^{-6}$                          | 27 °C and 97% RH   |
| GTUB5 [8]                | $3.00 \times 10^{-6}$                          | 75 °C and 75% RH   |

Equivalent circuit LR(C(QR)):

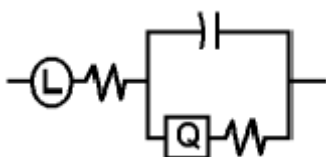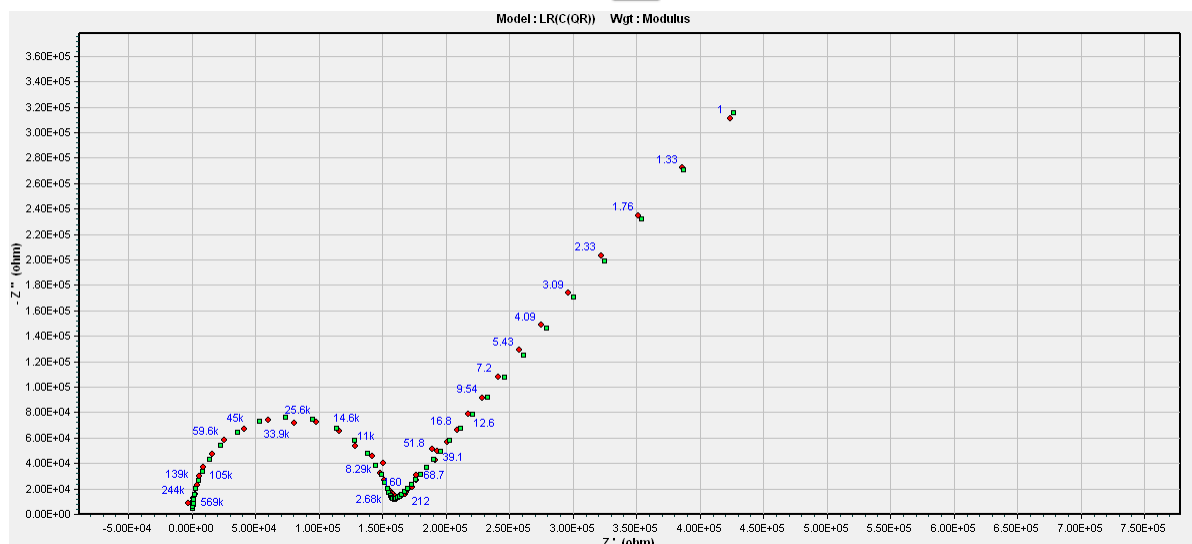

(a)

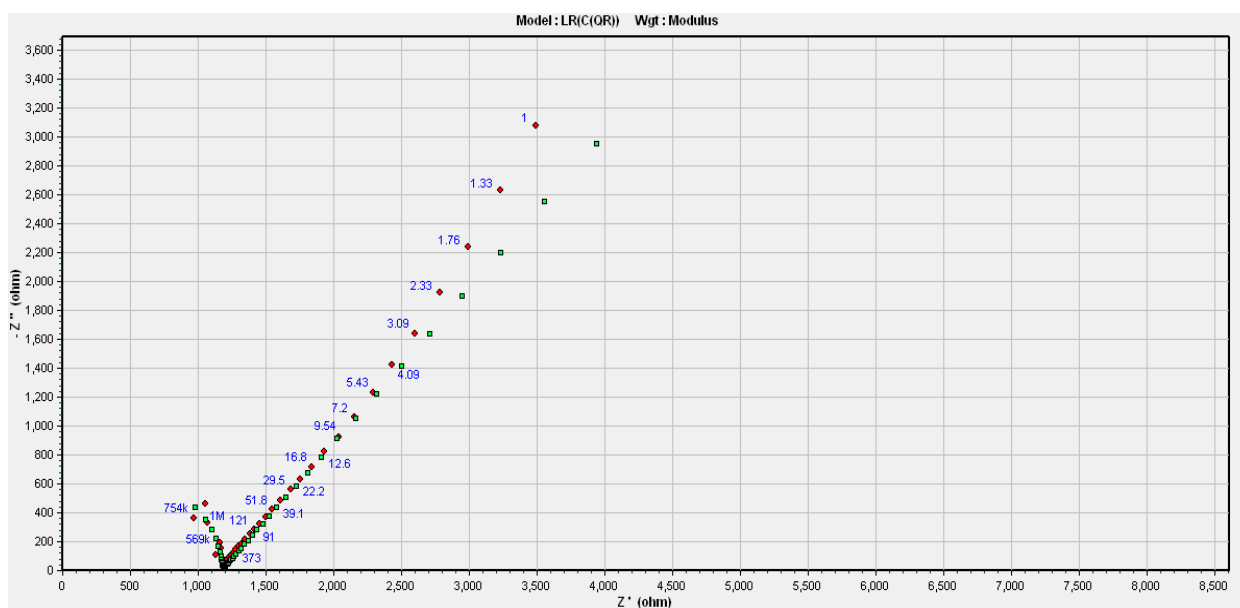

(b)

**Figure S1.** Nyquist plots for a polycrystalline sample of HOF **1** under 30 °C (a) and 100 °C (b) at 98% RH. Red circle and green square are the measured impedance spectroscopy values and the fits of the impedance data to the equivalent circuit of LR(C(QR)).

Equivalent circuit LR(Q(R(QR))):

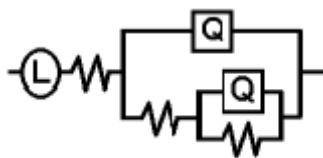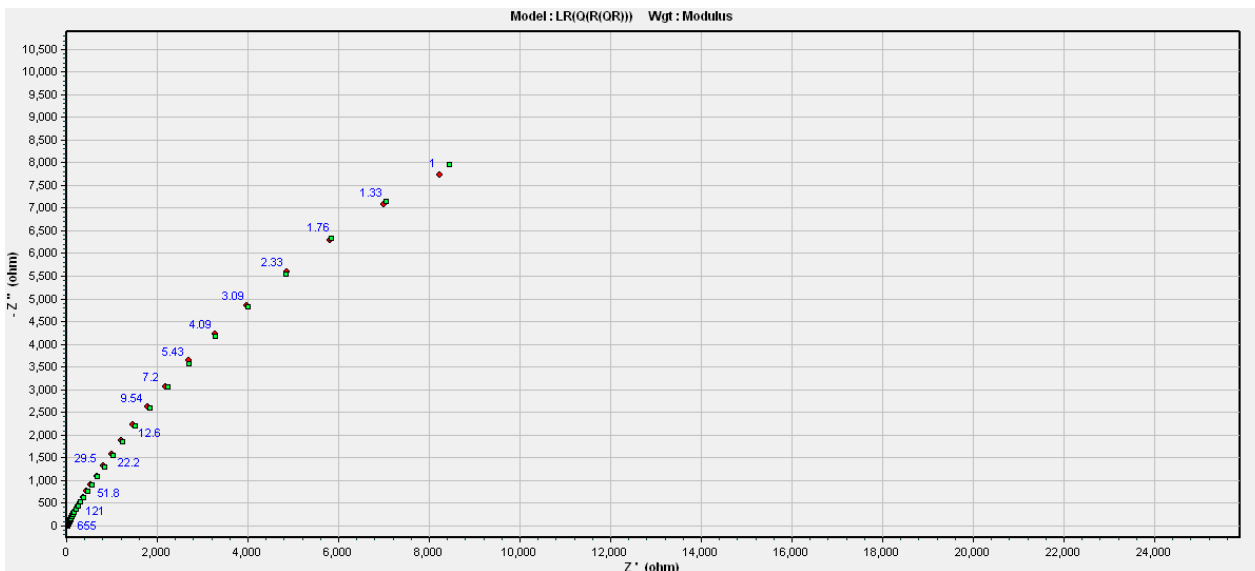

(a)

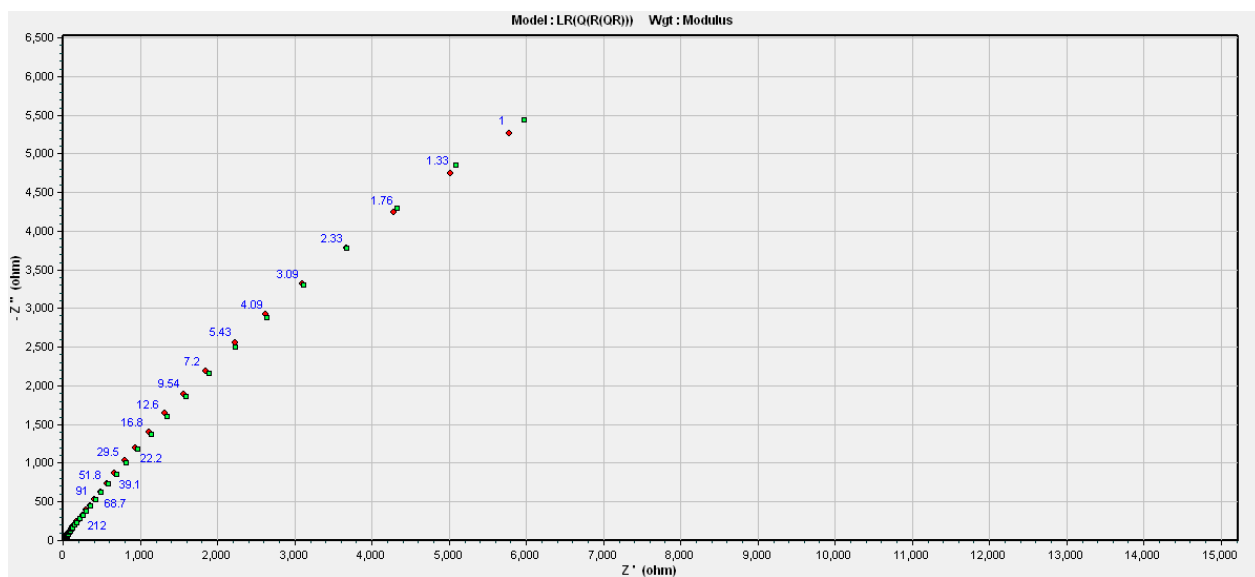

(b)



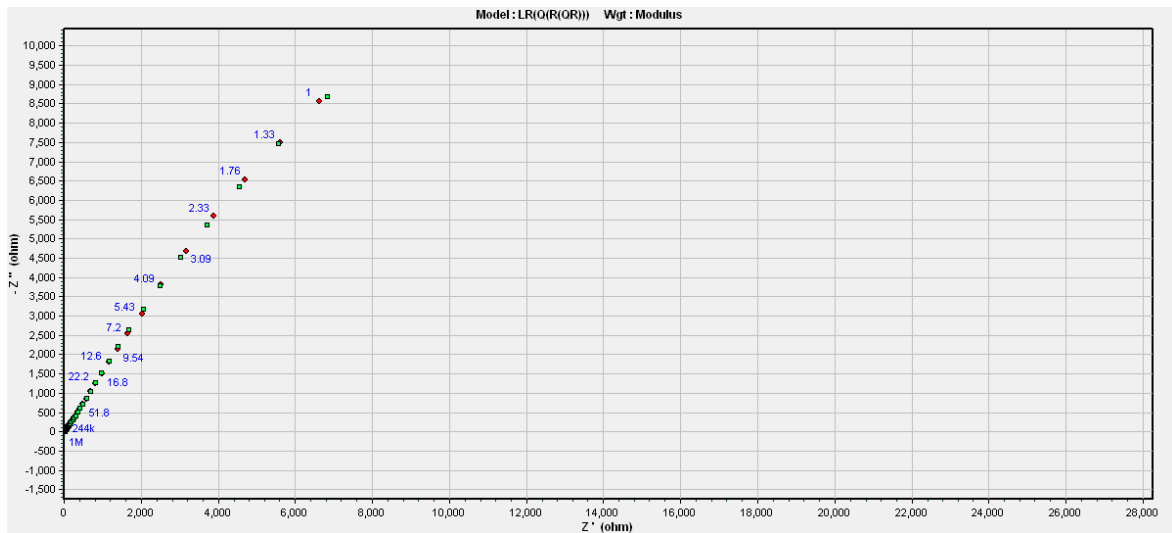

(c)

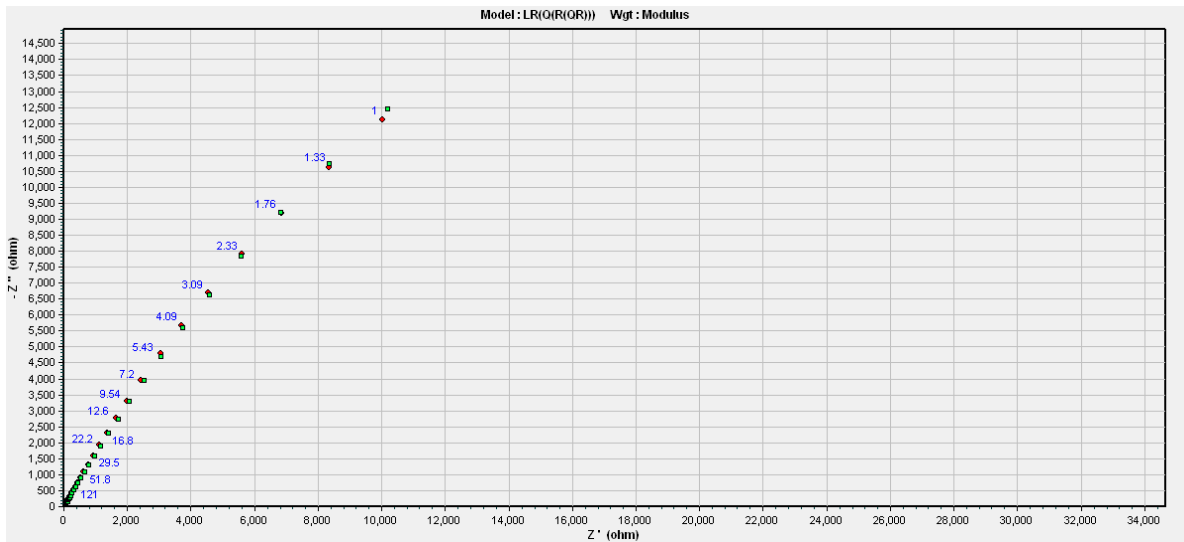

(d)

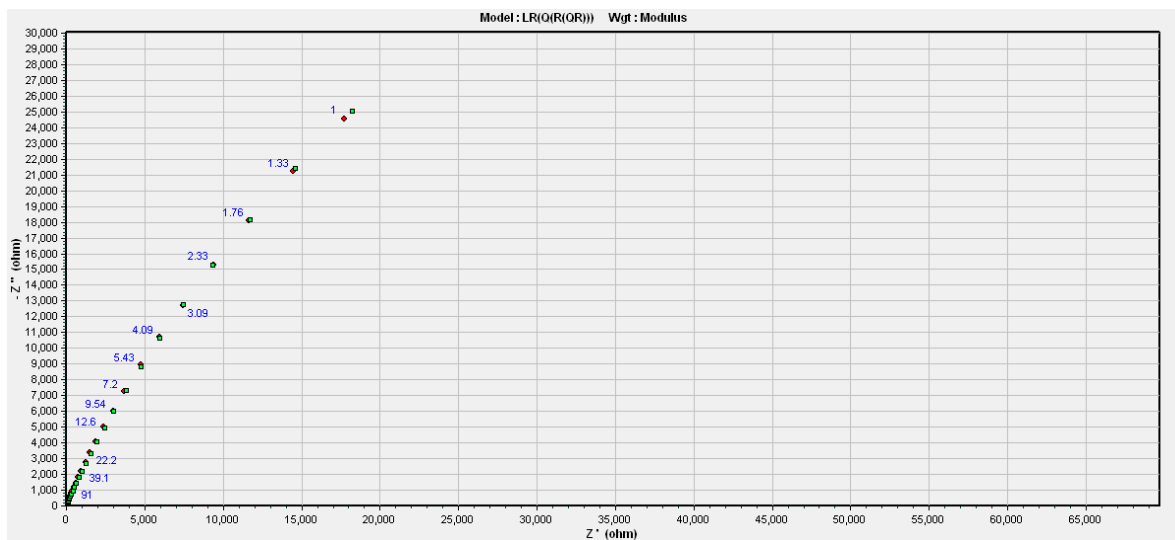

(e)

Figure S2. Nyquist plots for composite membrane samples of Pure CS membrane (a) and CS/HOF-

2 (b) and CS/HOF-4 (c) and CS/HOF-6 (d) and CS/HOF-8 (e) under 98% RH and 100 °C. Red circle and green square are the measured impedance spectroscopy values and the fits of the impedance data to the equivalent circuit of LR(Q(R(QR))).

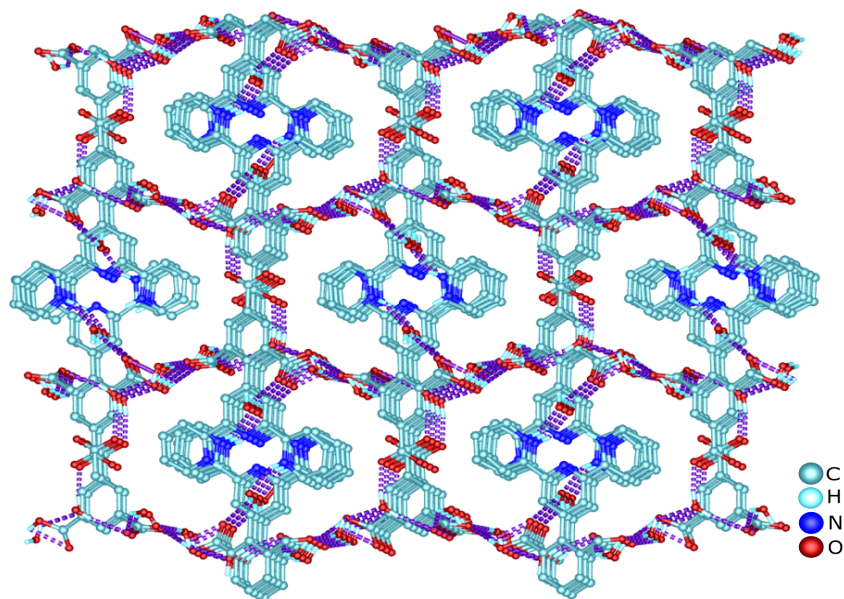

Figure S3. The 3D framework of 1 supported by intermolecular H-bonds and  $\pi$ -interactions.

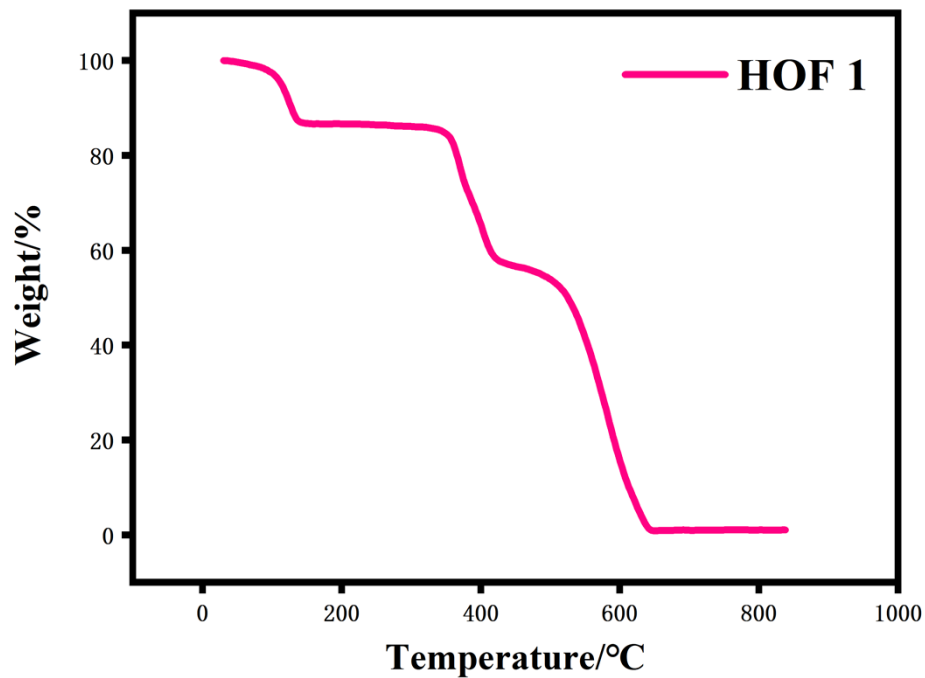

Figure S4. TG analysis profiles of HOF 1.

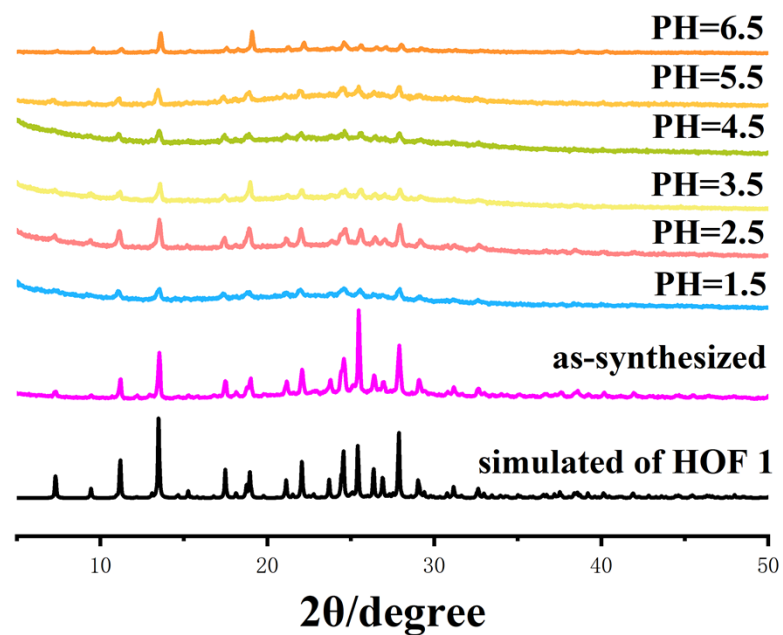

**Figure S5.** The PXRD patterns of crystals for **1** after soaking in different acidic solutions.

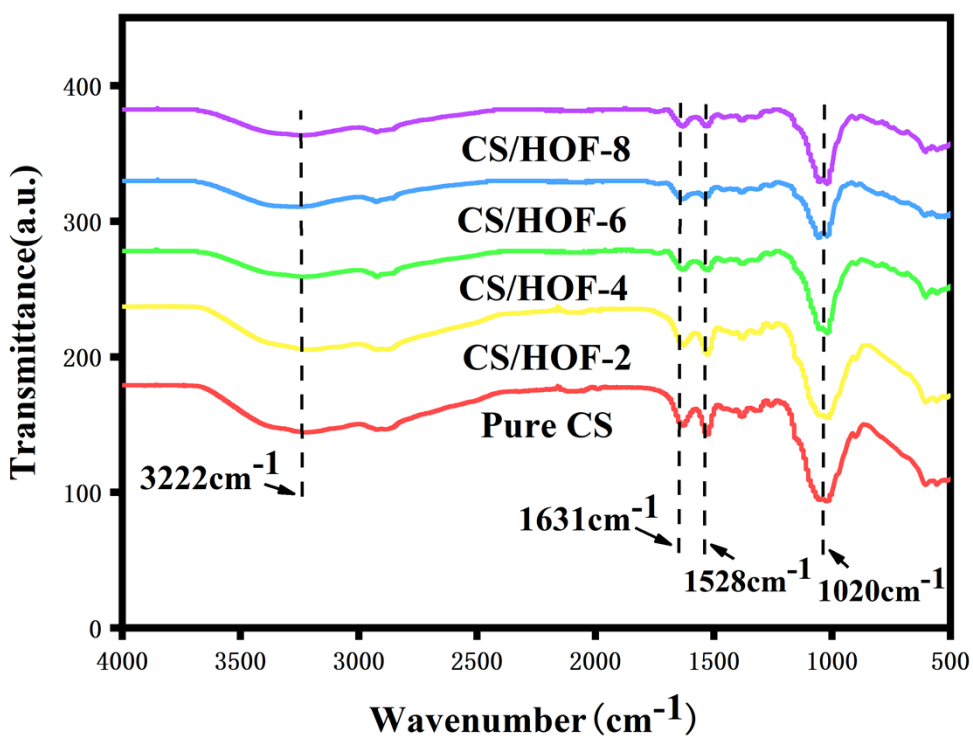

**Figure S6.** The Fourier Transform Infrared spectra of the CS/HOF-x.

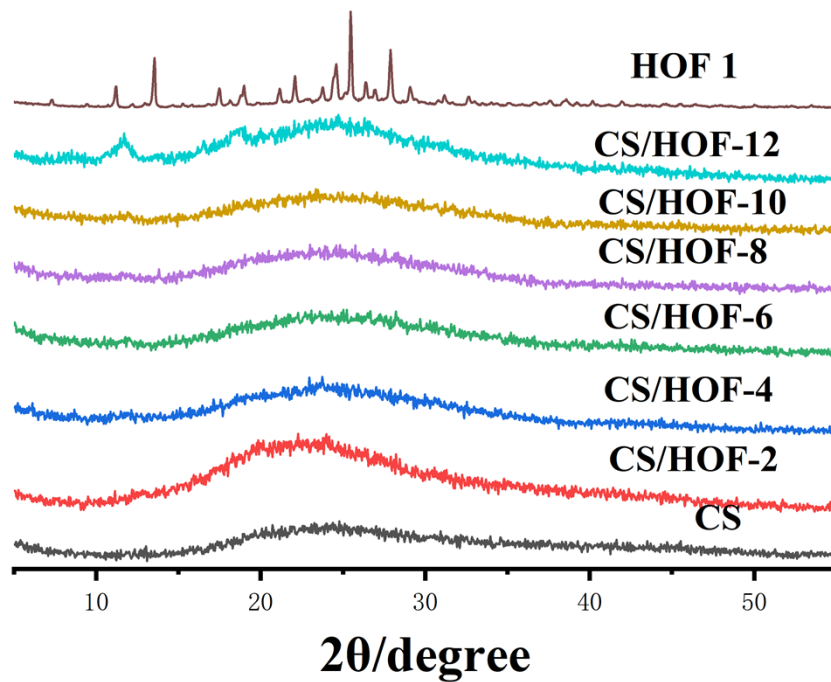

Figure S7. The PXRD patterns of CS/HOF-x

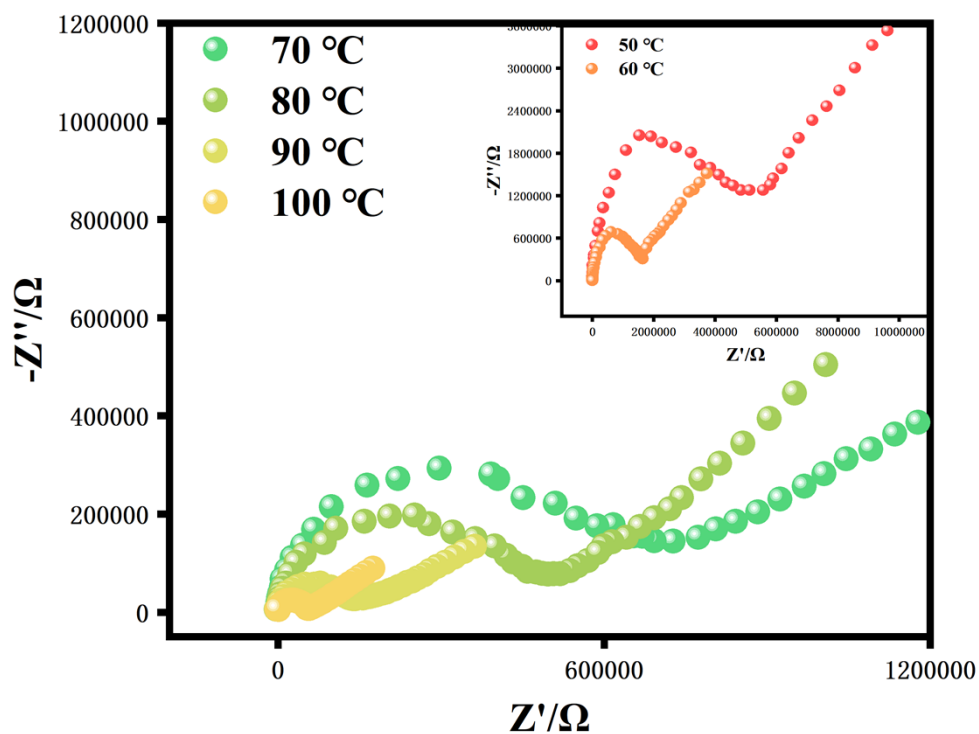

Figure S8. Impedance spectra of HOF 1 at 50-100 °C and 68% RH.

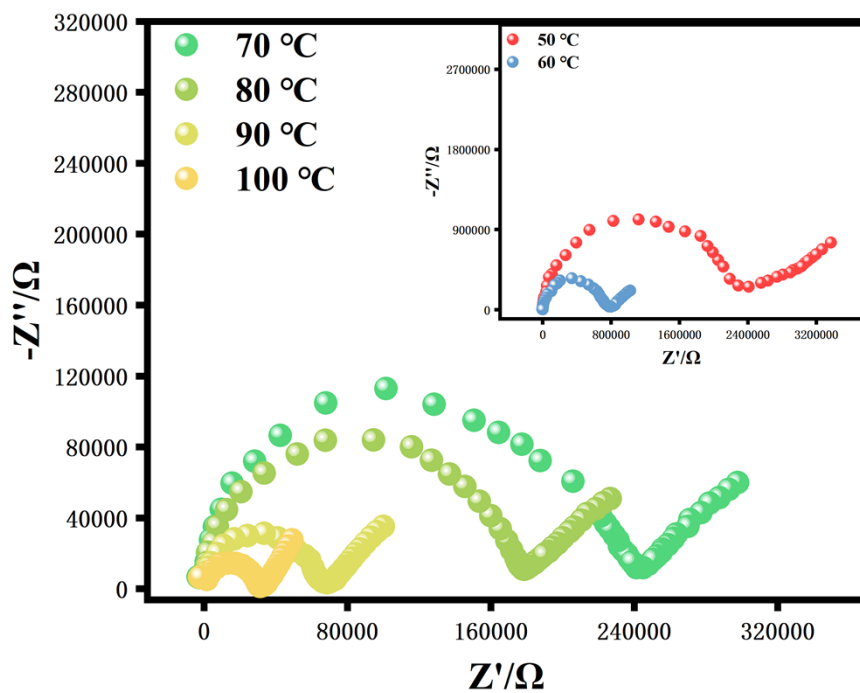

Figure S9. Impedance spectra of HOF 1 at 50-100 °C and 75% RHs.

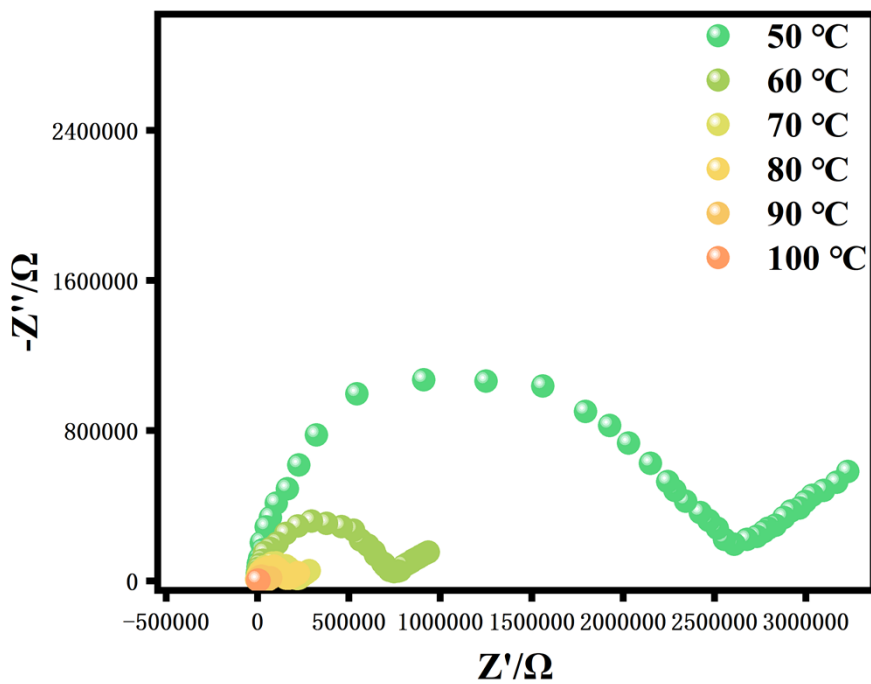

Figure S10. Impedance spectra of HOF 1 at 50-100 °C under 85% RH.

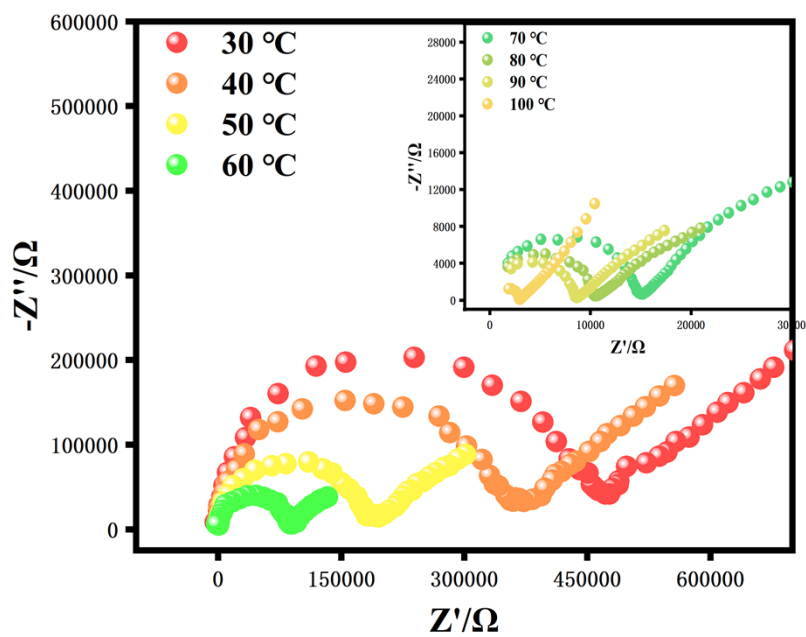

Figure S11. Impedance spectra of HOF 1 at 30-100 °C under 93% RH.

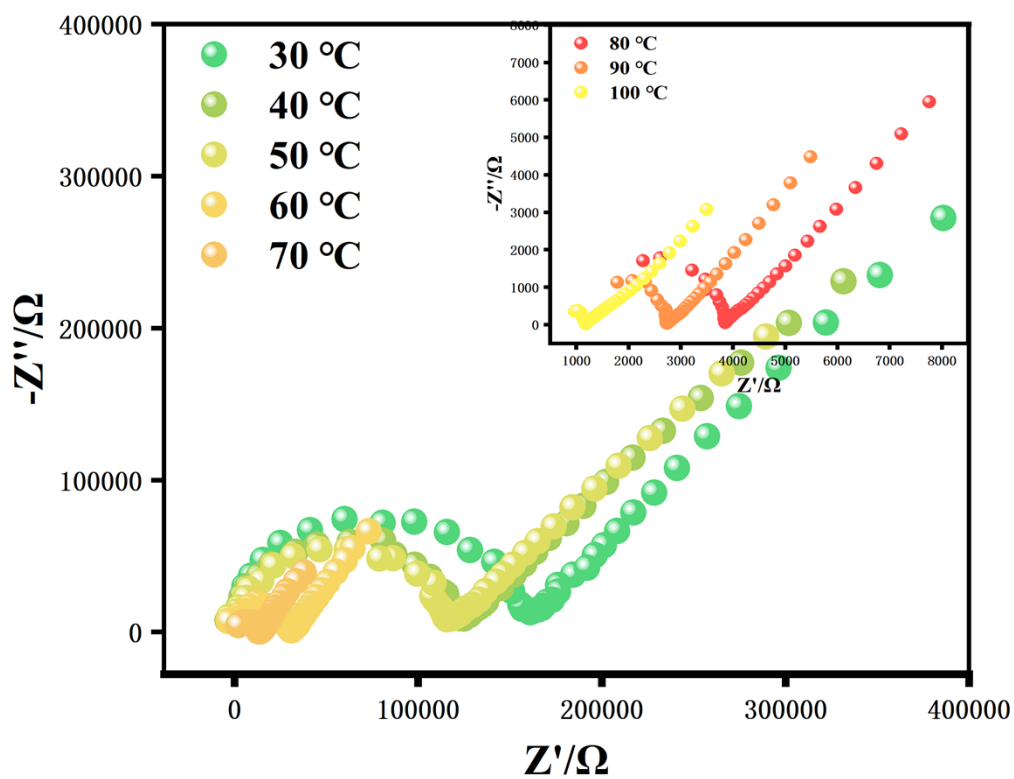

Figure S12. Impedance spectra of HOF 1 at 30-100 °C under 98% RH.

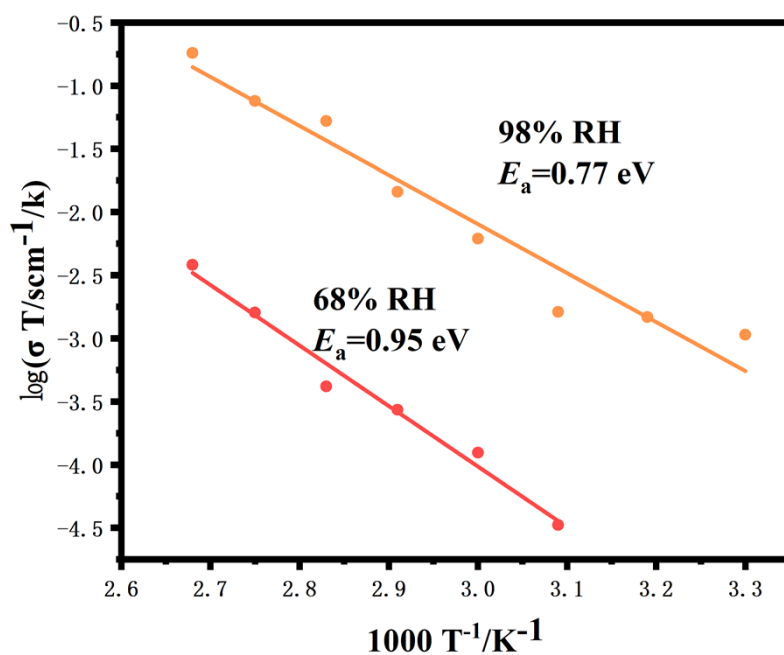

Figure S13. Arrhenius plots of the  $\sigma$  for HOF 1 under 98% and 68% RHs.

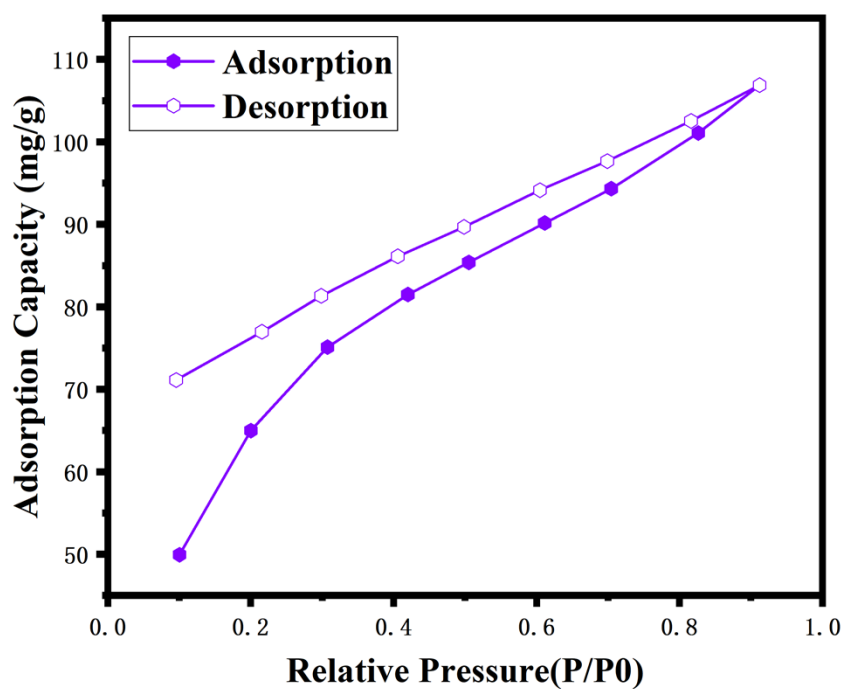

Figure 14. Water vapor adsorption/desorption isotherms of HOF 1 at 25 °C.

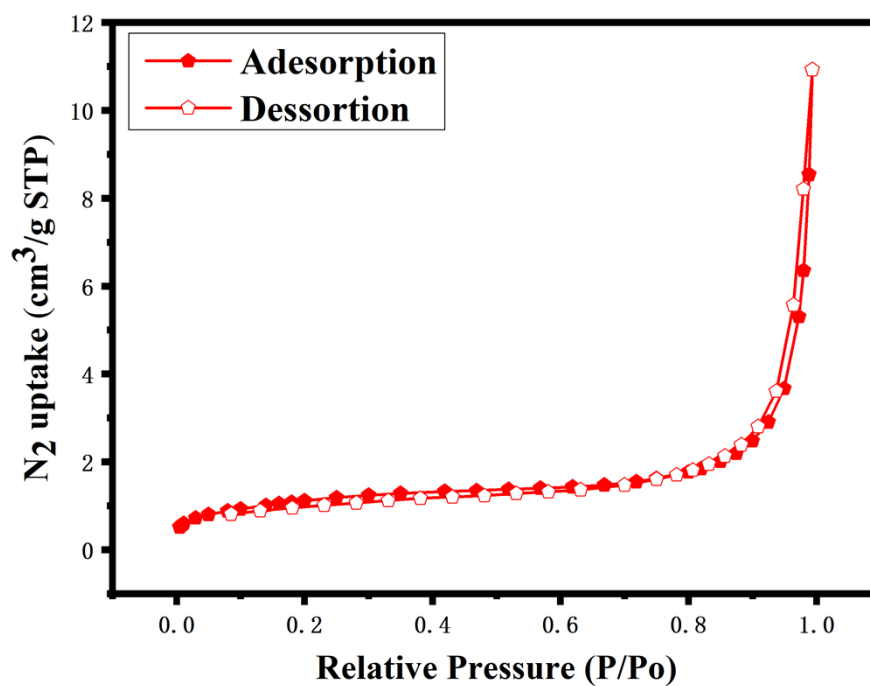

**Figure S15.** N<sub>2</sub> adsorption–desorption isotherms of HOF 1.

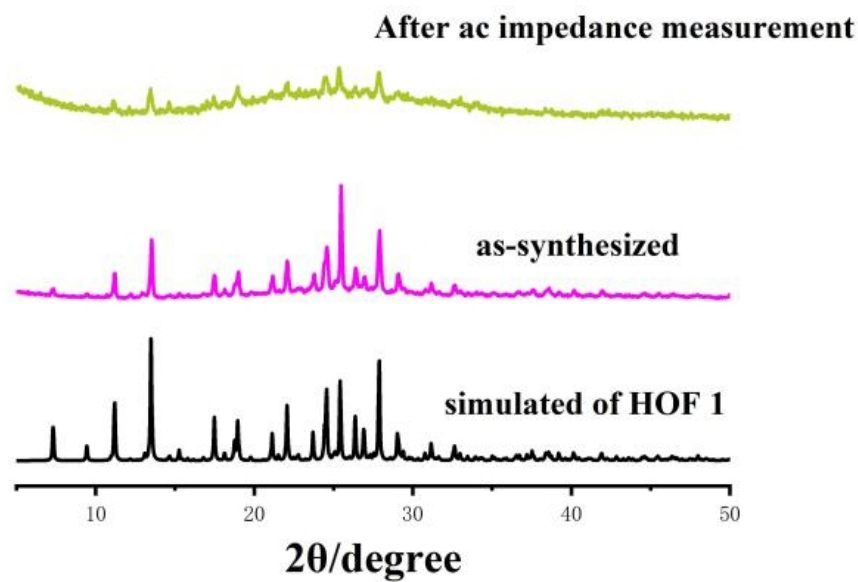

**Figure S16.** The PXRD patterns of HOF 1 before and after impedance measurement.



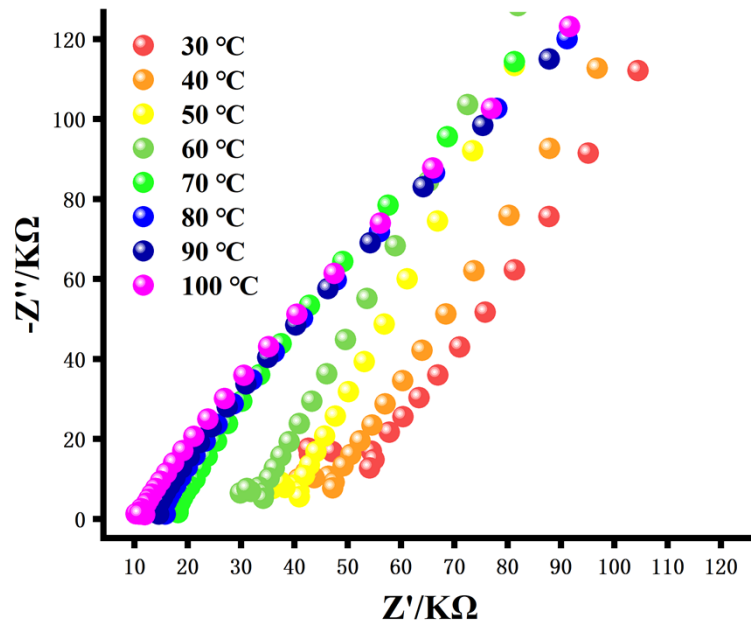

(a)

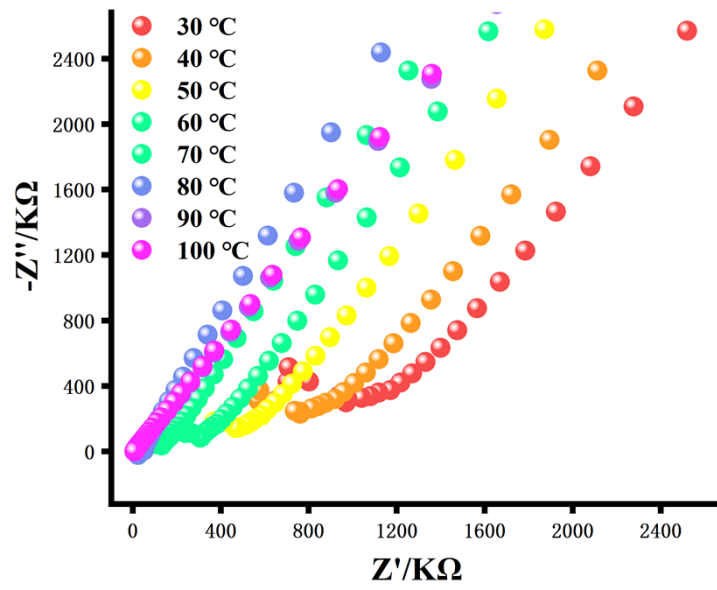

(b)

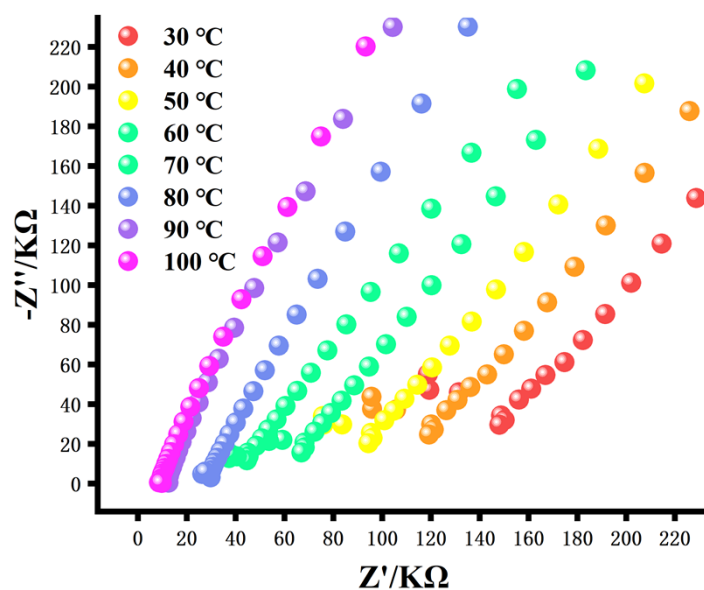

(c)

**Figure S17.** Impedance spectra of CS/HOF-x at 98% RH and 30-100 °C. (a) CS/HOF-2 (b) CS/HOF-6 (c) CS/HOF-8

## REFERENCES

1. Q. Yang, Y. Wang, Y. Shang, J. Du, J. Yin, D. Liu, Z. Kang, R. Wang, D. Sun, J. Jiang, *Cryst. Growth Des.*, 2020, **20**, 3456-3465.
2. A. Karmakar, R. Illathvalappil, B. Anothumakkool, A. Sen, P. Samanta, A.V. Desai, S. Kurungot, S.K. Ghosh, *Angew. Chem., Int. Ed.* 2016, **55**, 1-6.
3. G. Xing, T. Yan, S. Das, T. Ben, S. Qiu A, *Angew. Chem., Int. Ed.* 2018, **57**, 5345-5349.
4. S. Chand, S.C. Pal, A. Pal, Y. Ye, Q. Lin, Z. Zhang, S. Xiang, M.C. Das, *Chem-Eur.J.* 2019, **25**, 1691-1695.
5. B.-B. Hao, X.-X. Wang, C.-X. Zhang, Q. Wang, *Cryst. Growth Des.*, 2021, **21**, 3908-3915.
6. Z.-B. Sun, Y.-L. Li, Z.-H. Zhang, Z.-F. Li, B. Xiao, G. Li, *New. J. Chem.*, 2019, **43**, 10637-10644.
7. W. Yang, F. Yang, T.-L. Hu, S.C. King, H. Wang, H. Wu, H. Zhou, J.-R. Li, Arman, H.D.; B. Chen, *Cryst. Growth Des.*, 2016, **16**, 5831-5835.
8. P. Tholen, C.A. Peebles, R. Schaper, C. Bayraktar, T.S. Erkal, M.M. Ayhan, B. Cost, J. Beckmann, A.O. Yazaydin, M. Wark, G. Hanna, Y. Zorlu, G. Yucesan, *Nat. Commun.*, 2020, **11**, 3180.
